# Supplementary material for: Molecular design strategy of fluorogenic probes based on quantum chemical prediction of intramolecular spirocyclization
Source: PubMed Central journal article supplement (PMC9814528; doi:10.1038/s42004-020-0326-x), 2020-06-26
Supplement: 42004_2020_326_MOESM2_ESM.pdf [file 42004_2020_326_MOESM2_ESM.pdf]

## **Description of Additional Supplementary Files**

File Name: Supplementary Data

Description: Cartesian coordinates of the optimized structures used in pKcycl calculation
